# Supplementary material for: A novel 6-gene signature derived from tumor-infiltrating T cells and neutrophils predicts survival of bladder urothelial carcinoma
Source: Aging (Albany NY). 2021 Dec 14;13(23):25496–517. doi: 10.18632/aging.203770 (PMC8714163; doi:10.18632/aging.203770)
Supplement: Supplementary Figures [file aging-13-203770-s001.pdf]

SUPPLEMENTARY FIGURES

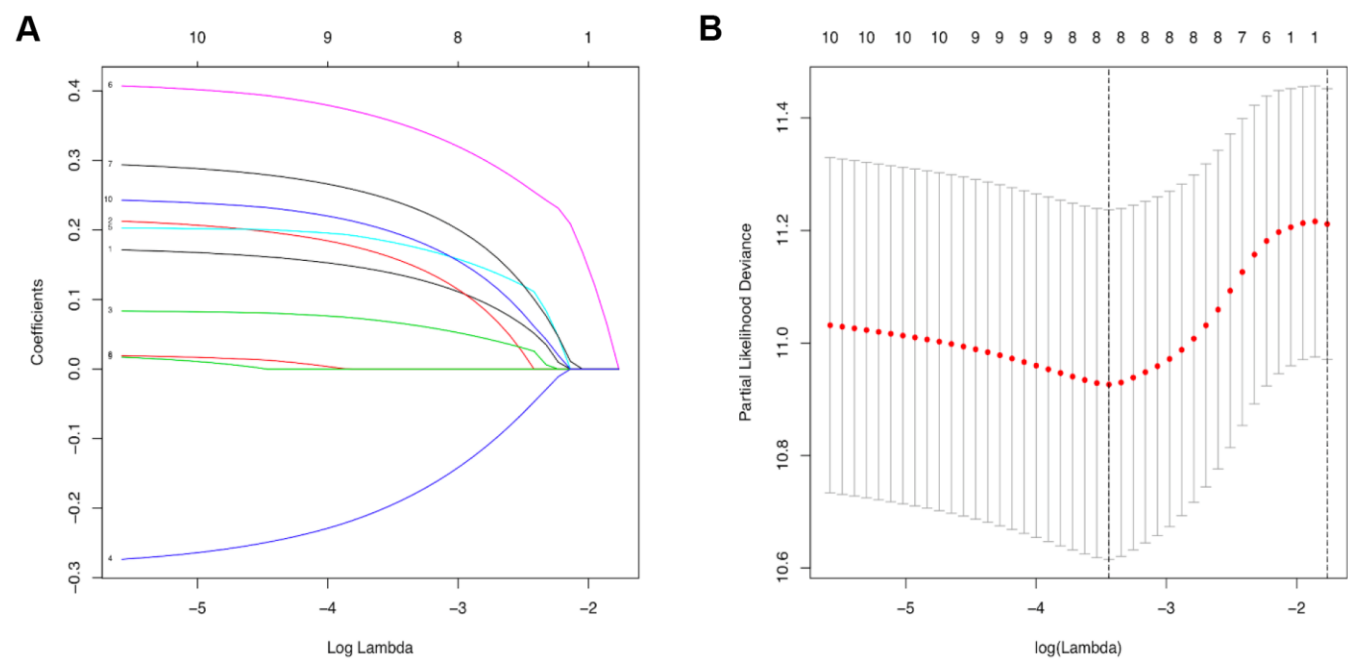

**Supplementary Figure 1. Lasso regression analysis screened out 8 genes without redundancy.** Lasso coefficient profiles of the T cell and neutrophil-associated genes (A). A coefficient profile plot against the log ( $\lambda$ ) sequence was generated to select the optimal parameter ( $\lambda$ ) in the Lasso model (B).

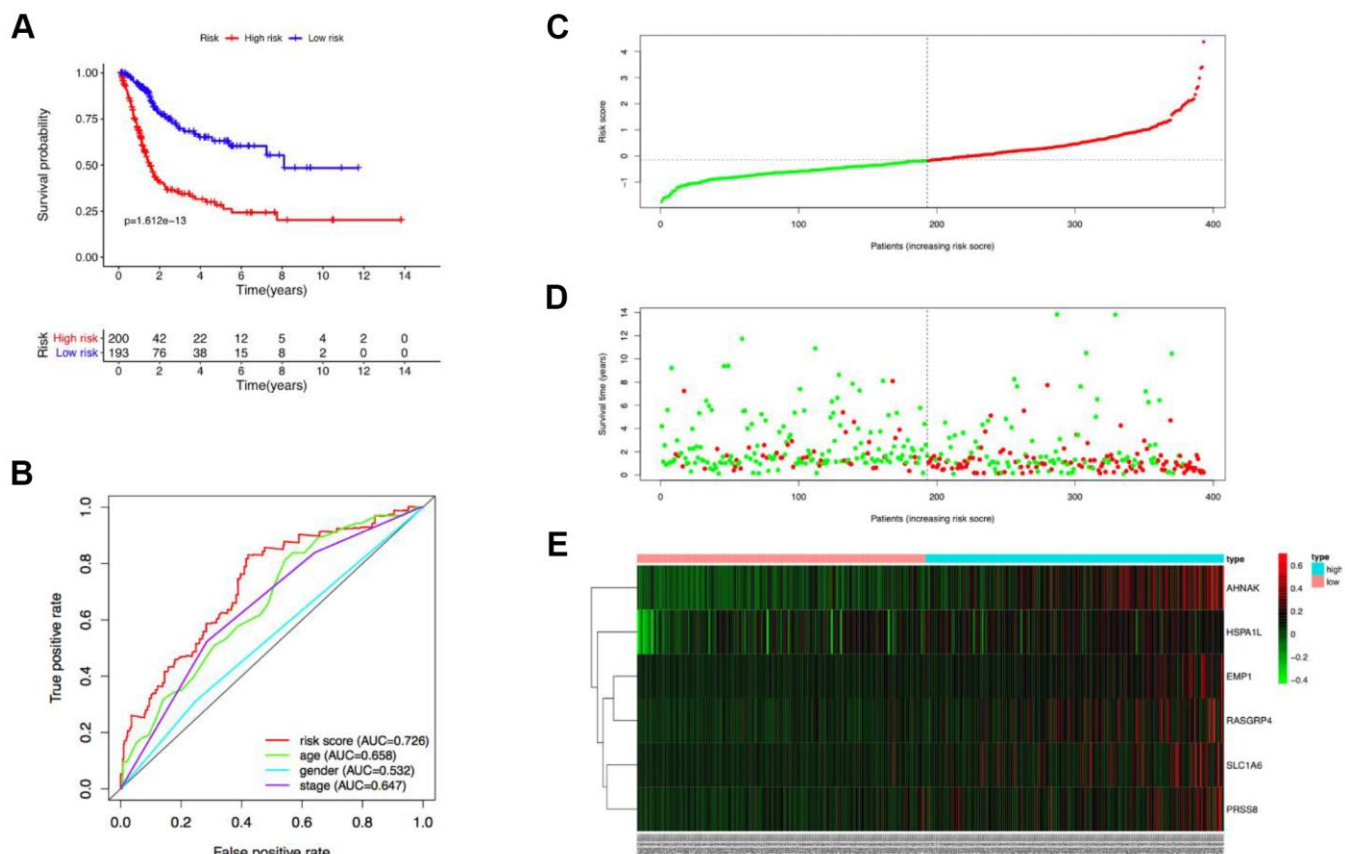

**Supplementary Figure 2. The prognostic performance of the identified model in the whole TCGA-BLCA dataset. (A)** Comparison of the overall survival between the estimated high-risk and low-risk patients. **(B)** The survival receiver operating characteristic (ROC) curves comparing prognostic value of the model and other clinical factors. **(C–E)** The change of patients' survival status (red dot represents dead case) and gene expression levels when risk score increased.

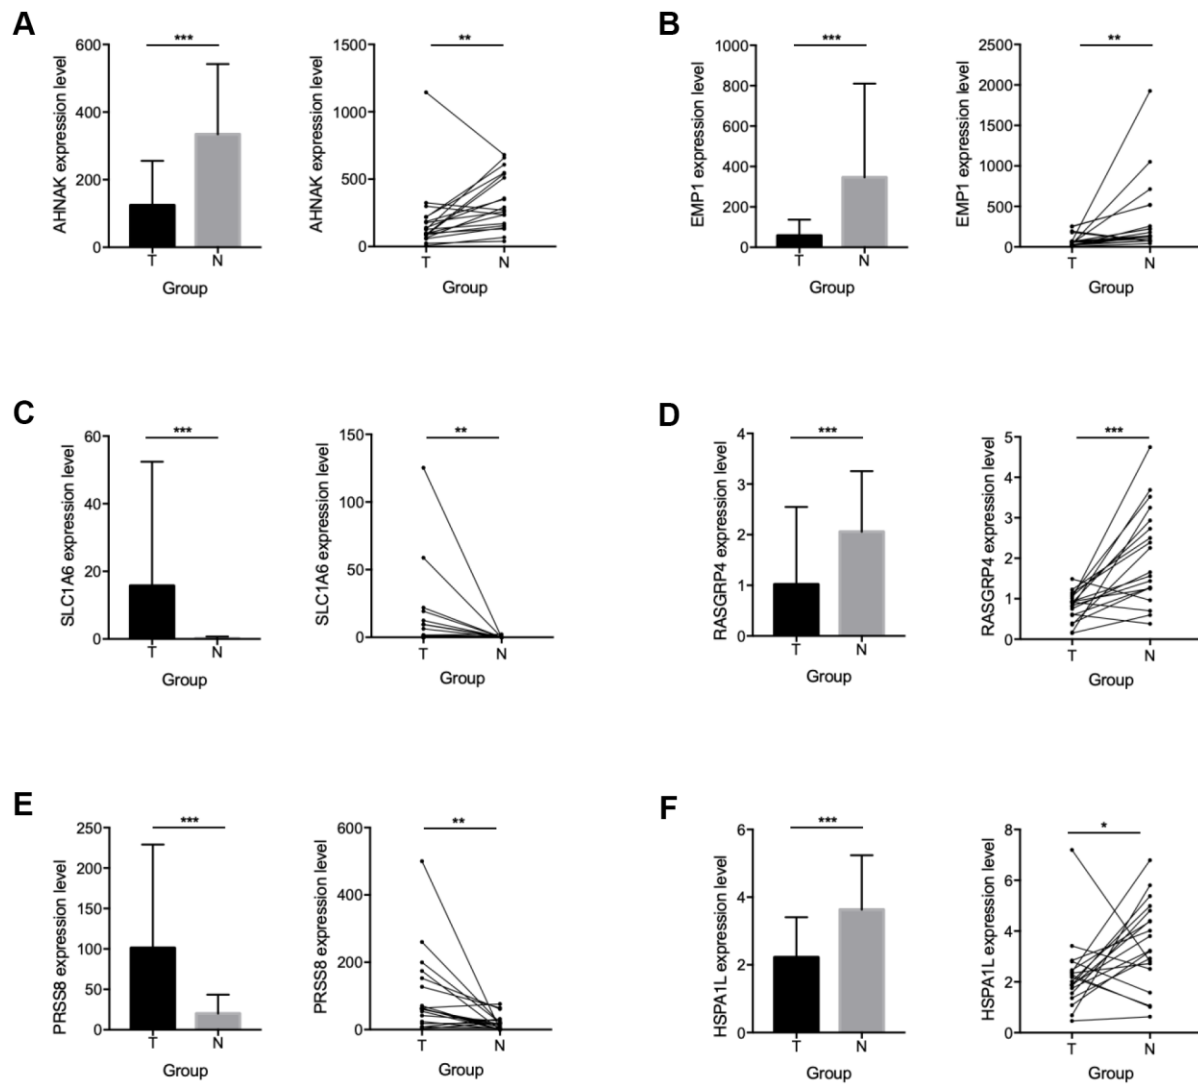

**Supplementary Figure 3. Expression levels of the 6 key genes in BUC tumor tissues and adjacent normal tissues in the TCGA-BLCA dataset.** (A) AHNAK; (B) EMP1; (C) SLC1A6; (D) RASGRP4; (E) PRSS8; (F) HSPA1L. Unpaired (left) and paired (right) nonparametric tests were performed for comparison. \*\*\*  $P < 0.001$ , \*\*  $P < 0.01$ , \*  $P < 0.05$ .

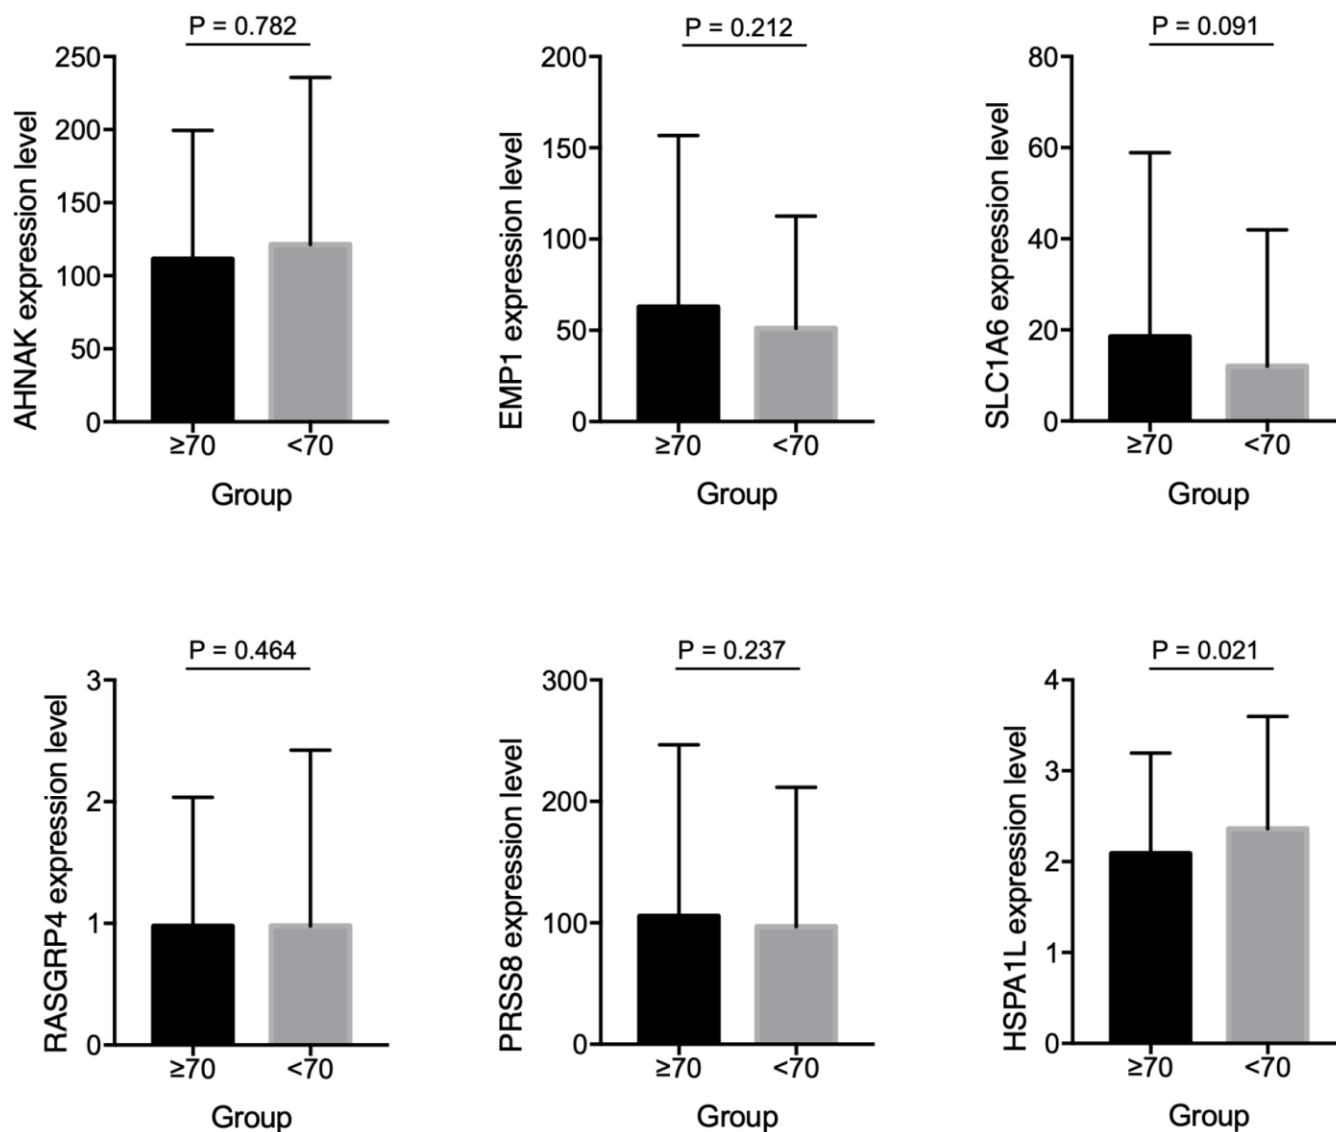

**Supplementary Figure 4. Expression levels of the 6 key genes in different age groups.** Mann-Whitney test was performed.

**A**

**AHNAK**

|                                             |
|---------------------------------------------|
| <b>HPA026643</b>                            |
| Female, age 60                              |
| Urinary bladder (T-74000)                   |
| Urothelial carcinoma, High grade (M-812033) |
| Patient id: 3517                            |
| <b>Tumor cells</b>                          |
| Staining: <b>High</b>                       |
| Intensity: <b>Strong</b>                    |
| Quantity: <b>&gt;75%</b>                    |
| Location: <b>Cytoplasmic/membranous</b>     |

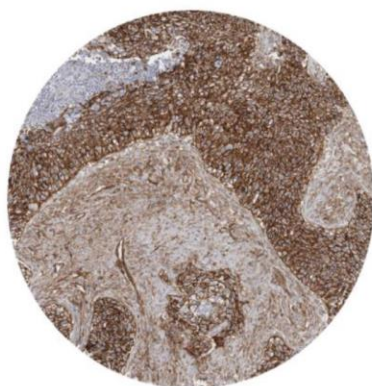

**B**

**SLC1A6**

|                                            |
|--------------------------------------------|
| <b>HPA044066</b>                           |
| Male, age 78                               |
| Urinary bladder (T-74000)                  |
| Urothelial carcinoma, Low grade (M-812031) |
| Patient id: 2469                           |
| <b>Tumor cells</b>                         |
| Staining: <b>Medium</b>                    |
| Intensity: <b>Moderate</b>                 |
| Quantity: <b>&gt;75%</b>                   |
| Location: <b>Cytoplasmic/membranous</b>    |

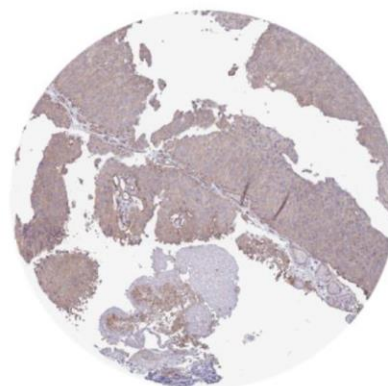

**C**

**PRSS8**

|                                             |
|---------------------------------------------|
| <b>HPA030436</b>                            |
| Female, age 60                              |
| Urinary bladder (T-74000)                   |
| Urothelial carcinoma, High grade (M-812033) |
| Patient id: 3517                            |
| <b>Tumor cells</b>                          |
| Staining: <b>Medium</b>                     |
| Intensity: <b>Moderate</b>                  |
| Quantity: <b>75%-25%</b>                    |
| Location: <b>Cytoplasmic/membranous</b>     |

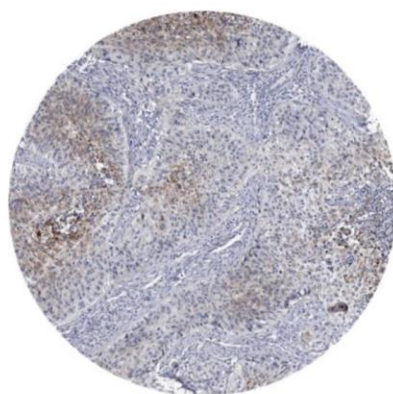

**D**

**HSPA1L**

|                                     |
|-------------------------------------|
| <b>HPA052504</b>                    |
| Male, age 55                        |
| Urinary bladder (T-74000)           |
| Urothelial carcinoma, NOS (M-81203) |
| Patient id: 751                     |
| <b>Tumor cells</b>                  |
| Staining: <b>Medium</b>             |
| Intensity: <b>Moderate</b>          |
| Quantity: <b>75%-25%</b>            |
| Location: <b>Nuclear</b>            |

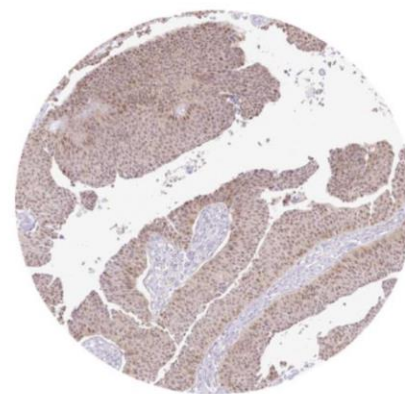

Supplementary Figure 5. Typical immunostaining graphs of the identified key genes in BUC tumor tissues provided in the human protein atlas database. (A) AHNAK; (B) SLC1A6; (C) PRSS8; (D) HSPA1L.
