# Supplementary material for: A novel 6-gene signature derived from tumor-infiltrating T cells and neutrophils predicts survival of bladder urothelial carcinoma
Source: publisher site journal article supplement (doi:10.18632/aging.203770), 2021-12-14
Supplement: Supplementary file [file aging-v13i23-203770-supplementary-material-SD2.pdf]

**Supplementary Table 1. The sequences of primers used in this study.**

| <b>Gene</b>    | <b>Forward premier (5' to 3')</b> | <b>Reverse premier (5' to 3')</b> |
|----------------|-----------------------------------|-----------------------------------|
| <b>EMP1</b>    | GTGTTCAGCTCTTCACCATGG             | GGAATAGCCGTGGTGATACTGC            |
| <b>RASGRP4</b> | GCACAGGTGCTGGACAAGTTCA            | GTCCTTGAGTCTGGAGATGGCA            |
| <b>HSPA1L</b>  | AGCGGCTGCTTCAGGACTACTT            | CCATCAGGATGGCTGCTTGTAC            |
| <b>AHNAK</b>   | CGTGAAGTCTTCAGCTCCTGCA            | GAGGTCTCCTTCCACTCCATCT            |
| <b>SLC1A6</b>  | AACACAAGGGCAGAGTCCTCAG            | CCAGCAATCAGGAACAGGATGC            |
| <b>PRSS8</b>   | CAGCATCACCTATGAAGGCGTC            | TCCTCGGAGTAGGAGTCTAGCT            |
| <b>GAPDH</b>   | GTCTCCTCTGACTTCAACAGCG            | ACCACCCTGTTGCTGTAGCCAA            |
