# Supplementary material for: A novel 6-gene signature derived from tumor-infiltrating T cells and neutrophils predicts survival of bladder urothelial carcinoma
Source: Aging (Albany NY). 2021 Dec 14;13(23):25496–517. doi: 10.18632/aging.203770 (PMC8714163; doi:10.18632/aging.203770)
Supplement: Supplementary Table 2 [file aging-13-203770-s003.xlsx]

## Sheet: Table S2
Supplementary Table 2. Identification of candidate 164 genes.
(The mean of normalized count value among cancer samples, r and p-value of Spearman's rank correlation analysis was presented.)
	Expression	T cell		Neutrophils
Gene	Mean count	r	p	r	p
SPATA21	11.4185	-0.157406	0.00136772	0.135806	0.00582232
CORT	19.219	0.133185	0.00685304	-0.159827	0.00114895
CD300LG	12.2652	-0.108392	0.0280042	0.168278	0.000613464
FITM1	21.0462	0.151392	0.00208675	-0.12591	0.0106193
GNMT	25.1557	0.124316	0.0116558	-0.11371	0.0211263
TEX22	27.5134	0.182554	0.000198454	-0.107579	0.0292089
ZNF709	27.4136	0.151453	0.002078	-0.110347	0.0252793
FXYD1	22.944	-0.116075	0.0185723	0.214007	1.20778e-05
SLC10A5	35.2701	0.124853	0.011297	-0.120043	0.0148898
MCEMP1	34.7908	-0.162376	0.000953821	0.477262	9.05095e-25
MSH5-SAPCD1	39.2433	0.12041	0.0145838	-0.100122	0.042488
ZNF20	39.8491	0.124484	0.0115427	-0.107301	0.0296308
SPAG8	48.8394	0.149009	0.00245691	-0.132758	0.00703523
FHL5	39.0827	-0.112258	0.0228403	0.134261	0.00641142
FAM180A	39.9927	-0.186019	0.000148922	0.191094	9.68861e-05
CUZD1	69.9246	0.123368	0.0123146	-0.0991775	0.044487
RASGRP4	65.6277	-0.115176	0.0195096	0.142268	0.00385051
ADGRG3	71.9854	-0.115642	0.0190195	0.564539	5.74245e-36
OR13A1	84.9805	0.129412	0.00862291	-0.098755	0.0454065
HSPA1L	94.5839	0.135548	0.00591734	-0.10771	0.0290121
GPR1	104.263	-0.112856	0.0221202	0.135441	0.00595713
ZNF763	110.333	0.144208	0.00338998	-0.119902	0.0150085
IGF1	92.7737	-0.142327	0.00383586	0.131817	0.0074532
CATSPERG	140.489	0.114364	0.0203912	-0.0994758	0.0438475
GTF2IRD2	135.528	0.202201	3.63556e-05	-0.120512	0.0145
ACP7	164.762	-0.121954	0.013357	0.128546	0.00908271
FAM229A	159.971	0.124875	0.0112827	-0.101227	0.0402456
BDKRB1	130.927	-0.119022	0.0157708	0.13352	0.00671278
ZNF620	187.727	0.188315	0.000122771	-0.113633	0.0212145
CREG2	173.628	-0.11994	0.0149767	0.0986226	0.0456978
DUSP28	185.319	0.154195	0.00171697	-0.0999609	0.0428239
C17orf97	200.891	0.119152	0.0156554	-0.117941	0.0167517
ADAMTS16	168.423	-0.188293	0.000123	0.113548	0.0213115
C8orf44	208.18	0.105531	0.032443	-0.123441	0.0122624
PID1	177.002	-0.0987275	0.0454668	0.148194	0.00259662
AQP9	248.287	-0.0988134	0.0452784	0.219342	7.1902e-06
LGI4	197.358	-0.113968	0.0208338	0.154434	0.00168839
LYRM9	248.302	0.157361	0.0013721	-0.108283	0.0281629
COL13A1	240.8	-0.177267	0.000304483	0.12016	0.014792
C7orf31	272.927	0.131737	0.00748972	-0.129501	0.0085768
IPPK	306.988	-0.108276	0.0281727	0.122274	0.0131142
TNFAIP6	272.942	-0.159327	0.00119133	0.176811	0.000315752
SDS	349.35	-0.148584	0.00252878	0.0995094	0.0437759
C1orf56	395.066	0.129566	0.00854356	-0.134716	0.00623267
TRMT10B	439.097	0.180729	0.000230368	-0.113496	0.0213716
RFX3	460.723	0.131139	0.00776771	-0.0980621	0.0469487
ADGRE2	455.102	-0.130452	0.00809815	0.322076	2.25219e-11
LRTOMT	459.182	0.113934	0.0208723	-0.117273	0.0173854
ERG	431.088	-0.11699	0.0176593	0.133517	0.00671404
ZNF711	500.085	0.131146	0.00776443	-0.104332	0.0344751
ZFPM1	492.849	0.186953	0.000137709	-0.098047	0.0469829
AADAT	515.109	0.131236	0.00772208	-0.104235	0.0346439
HIC1	452.528	-0.22736	3.21813e-06	0.104812	0.03365
SLC24A3	455.971	-0.157069	0.00140102	0.117305	0.0173546
TMEM116	556.905	0.116566	0.0180772	-0.104545	0.034107
SLC11A1	593.72	-0.192916	8.28018e-05	0.149647	0.00235227
C14orf93	616.404	0.187189	0.000135009	-0.103944	0.0351558
MYL5	623.635	0.174857	0.000368627	-0.105919	0.0318083
MXD3	665.888	0.148815	0.00248954	-0.127961	0.00940525
SVEP1	478.277	-0.171726	0.000470811	0.130735	0.00796073
ADAMTS9	576.689	-0.16163	0.00100751	0.175201	0.000358756
PRICKLE2	588.041	-0.17363	0.000405929	0.107683	0.0290522
SEMA6B	674.978	-0.126752	0.010105	0.10512	0.0331278
CD96	728.304	0.270674	2.47373e-08	-0.101269	0.0401639
TUSC1	760.652	0.130013	0.00831602	-0.0984376	0.0461077
S1PR1	646.112	-0.11611	0.0185372	0.125072	0.0111536
P2RY2	786.401	-0.107748	0.0289544	0.101024	0.0406499
ADGRL4	721.883	-0.105157	0.0330662	0.112087	0.0230504
LYPD6	803.798	0.111122	0.0242642	-0.110278	0.0253716
MVB12B	784.397	0.211627	1.51585e-05	-0.103257	0.0363884
ROBO4	770.28	-0.108519	0.0278202	0.117365	0.0172966
ITGAX	805.659	-0.110636	0.0248973	0.104422	0.0343193
DPT	498.657	-0.109326	0.0266729	0.116543	0.0181009
ABHD14A	827.946	0.173297	0.000416646	-0.102469	0.0378472
CCDC61	844.309	0.112769	0.0222236	-0.102798	0.0372325
GLI4	954.328	0.107433	0.0294299	-0.117685	0.016992
ME3	949.418	0.21068	1.65809e-05	-0.0986058	0.045735
SGF29	980.978	0.106749	0.0304847	-0.102655	0.0374989
BDKRB2	851.917	-0.130358	0.00814443	0.103502	0.0359451
ZNF22	1051.77	0.13447	0.0063288	-0.0974549	0.0483361
ARHGEF4	1043.06	-0.109505	0.0264241	0.142982	0.0036749
FAM126A	1067.42	-0.118433	0.0162984	0.100071	0.042594
XRCC3	1090.28	0.153382	0.00181756	-0.105337	0.0327649
NUDT14	1054.33	0.109689	0.0261693	-0.102235	0.0382888
LATS2	996.779	-0.110172	0.025514	0.103178	0.0365319
RASIP1	1065.43	-0.0990812	0.0446953	0.154487	0.00168209
IDUA	1144.78	0.211997	1.46346e-05	-0.124118	0.0117908
ING1	1177.67	0.13044	0.00810417	-0.107642	0.0291143
PLD1	1210.8	-0.14973	0.00233902	0.0974463	0.0483559
STEAP4	1229.9	-0.100723	0.0412569	0.190454	0.000102349
ACSF3	1311.76	0.206293	2.49895e-05	-0.128465	0.00912675
RPAIN	1372.51	0.114235	0.0205339	-0.107973	0.0286201
HINT2	1344.37	0.12894	0.00887086	-0.118758	0.0160057
ZNF580	1324.34	0.110218	0.0254524	-0.126141	0.0104757
DPH7	1373.49	0.144141	0.003405	-0.101836	0.0390541
RPP25L	1408.05	0.158279	0.00128476	-0.122546	0.0129111
FHOD1	1451.18	-0.109217	0.0268257	0.122569	0.0128946
TAF13	1439.97	-0.125726	0.0107342	0.184684	0.000166446
GALNT6	1537.44	-0.111486	0.0238002	0.137627	0.00519076
IKZF3	1580.12	0.136505	0.00557226	-0.105678	0.0322017
ZNF32	1527.87	0.166215	0.000716996	-0.105256	0.0328995
NECAB3	1565.12	0.112121	0.0230084	-0.0985373	0.0458864
OLFML3	1354.99	-0.127176	0.00985437	0.100258	0.0422063
UPF3A	1634.69	0.148053	0.00262139	-0.10063	0.0414458
ARL16	1629.68	0.133552	0.00669938	-0.108067	0.0284801
ZNF428	1640.89	0.125972	0.0105807	-0.122085	0.0132572
IRF2BP1	1704.28	0.149937	0.00230616	-0.108609	0.0276899
SPIRE2	1669.87	0.160374	0.00110429	-0.0984137	0.0461609
DPM3	1679.28	0.131191	0.00774302	-0.104155	0.0347837
ARL4D	1654.87	-0.107362	0.0295378	0.104839	0.0336029
ACSS1	1798.74	0.0987591	0.0453975	-0.11384	0.0209786
TRIB3	1857.36	-0.134626	0.00626765	0.1193	0.0155263
SPHK1	1791.75	-0.164396	0.000821487	0.140058	0.00444386
KLHDC4	1865.42	0.144093	0.00341586	-0.116729	0.0179154
PPP1R3B	1717.8	-0.0997254	0.0433183	0.141187	0.00413115
THYN1	1871.83	0.140958	0.00419296	-0.122985	0.0125897
ZNF444	1905.63	0.117282	0.0173759	-0.109351	0.0266377
CROCC	1947.53	0.131889	0.00742038	-0.0990595	0.0447423
SLC1A6	2003.82	-0.134277	0.0064052	0.142971	0.00367746
BLOC1S1	1918.42	0.141212	0.00412443	-0.107713	0.0290081
PTHLH	2026.95	-0.111984	0.0231772	0.143719	0.00350095
PDK4	1311.54	-0.106929	0.0302044	0.13331	0.0068001
BOK	1933.82	-0.145473	0.00311703	0.122043	0.013289
ADAMTS4	1532.72	-0.106227	0.0313116	0.116502	0.018141
VANGL1	2447.92	-0.101542	0.0396256	0.117186	0.017469
ITPRIP	2228.13	-0.104551	0.034097	0.149799	0.002328
SBSN	2390.38	-0.113474	0.0213976	0.103633	0.0357085
ECI1	2482.75	0.158665	0.00124958	-0.127071	0.00991588
KCNK6	2442.4	-0.158132	0.00129846	0.131157	0.00775927
CD93	2666.48	-0.171182	0.000491064	0.107482	0.0293555
DEGS1	2852.55	-0.0986942	0.0455402	0.114388	0.0203653
TOM1	2914.39	-0.106711	0.0305441	0.172927	0.000428864
NDUFA3	2900.01	0.145947	0.00301998	-0.130712	0.00797153
COQ4	3110.04	0.143455	0.00356247	-0.0970482	0.0492845
BICD2	3270.02	-0.109715	0.0261339	0.104812	0.0336488
HMOX1	3483.29	-0.0983507	0.0463011	0.111857	0.0233345
SIVA1	3611.16	0.133371	0.00677479	-0.124814	0.0113226
CRISPLD2	3071.6	-0.193821	7.65506e-05	0.0995913	0.043602
PACS2	3789.25	0.117403	0.0172605	-0.101791	0.039141
MTSS1	4159.18	-0.178516	0.000275486	0.112205	0.0229052
METRNL	4199.4	-0.100276	0.0421688	0.0971655	0.0490093
ANKRD10	4478.54	0.185439	0.000156312	-0.126118	0.0104897
PARP10	4483.8	0.225816	3.76572e-06	-0.0999903	0.0427624
PRSS8	4961.44	-0.125549	0.0108466	0.129764	0.00844209
CLIP1	5059.3	-0.098224	0.0465846	0.12138	0.0138025
PECAM1	4779.92	-0.098041	0.0469964	0.106695	0.030569
MYADM	4303.02	-0.181532	0.000215771	0.0986871	0.0455556
UQCRQ	6559.75	0.180101	0.000242416	-0.106175	0.0313953
NDUFA4	7309.86	0.0981682	0.0467098	-0.0994632	0.0438743
PTGFRN	7882.86	-0.105459	0.0325618	0.106865	0.0303032
MCM3	9041.27	0.162543	0.000942183	-0.10668	0.0305934
KRT6B	9411.16	-0.100207	0.0423131	0.110937	0.0245044
SH3GLB2	9309.91	0.16162	0.00100824	-0.0977827	0.047583
EMP1	7478.19	-0.119412	0.015429	0.236801	1.20202e-06
GATA3	13498.9	0.1146	0.0201319	-0.108228	0.0282441
RRBP1	15982.1	-0.137179	0.00534015	0.127281	0.00979318
COX4I1	18076.5	0.182601	0.000197688	-0.0972599	0.048789
CD44	21235.4	-0.117983	0.0167125	0.134799	0.00620076
ANXA1	22093.9	-0.11551	0.0191564	0.143803	0.00348176
AHNAK	40131.9	-0.134932	0.00614933	0.100259	0.0422052
RPL28	57236.1	0.143535	0.00354374	-0.106035	0.0316208
RPL13	59858	0.16095	0.00105889	-0.100538	0.0416319
HLA-C	75240.1	0.212196	1.43609e-05	-0.101876	0.0389773
COL3A1	114038	-0.23247	1.89824e-06	0.103522	0.0359076
