# Supplementary material for: A novel 6-gene signature derived from tumor-infiltrating T cells and neutrophils predicts survival of bladder urothelial carcinoma
Source: Aging (Albany NY). 2021 Dec 14;13(23):25496–517. doi: 10.18632/aging.203770 (PMC8714163; doi:10.18632/aging.203770)
Supplement: Supplementary Table 3 [file aging-13-203770-s004.xlsx]

## Sheet: Table S3
Supplementary Table 3. Results of univariate Cox regression analysis in the TCGA training set.
(Significant genes identified using Lasso regression analysis are in bold font; HR: hazard ratio; 95% CI: confidence interval.)
id	HR(95%CI)	P-value
EMP1	1.467(1.202,1.79)	<0.001
AHNAK	1.696(1.356,2.122)	<0.001
SLC1A6	1.271(1.101,1.467)	0.001
MCEMP1	1.394(1.128,1.724)	0.002
RASGRP4	1.282(1.089,1.51)	0.003
FAM180A	1.608(1.173,2.205)	0.003
PRSS8	1.349(1.103,1.65)	0.004
STEAP4	1.275(1.068,1.523)	0.007
HSPA1L	0.689(0.52,0.913)	0.009
ADAMTS16	1.58(1.122,2.227)	0.009
SLC10A5	0.628(0.43,0.918)	0.016
IKZF3	0.675(0.489,0.932)	0.017
CD93	1.236(1.038,1.471)	0.017
KCNK6	1.204(1.032,1.404)	0.018
HMOX1	1.589(1.056,2.391)	0.026
CD96	0.708(0.519,0.967)	0.03
PLD1	1.219(1.019,1.459)	0.03
LATS2	1.287(1.021,1.622)	0.032
PPP1R3B	0.67(0.464,0.967)	0.033
TOM1	1.221(1.015,1.468)	0.034
ME3	0.732(0.548,0.977)	0.035
C17orf97	0.744(0.564,0.981)	0.036
IGF1	1.335(1.017,1.753)	0.037
C8orf44	0.726(0.533,0.99)	0.043
MYADM	1.22(1.006,1.479)	0.044
FAM126A	1.241(1.006,1.53)	0.044
ADGRE2	1.176(1.002,1.379)	0.047
BOK	1.215(0.993,1.486)	0.059
PID1	1.168(0.986,1.384)	0.072
GATA3	0.784(0.601,1.025)	0.075
HIC1	1.161(0.983,1.371)	0.079
IDUA	0.789(0.605,1.029)	0.081
RRBP1	1.174(0.977,1.41)	0.086
CROCC	0.802(0.623,1.034)	0.088
METRNL	1.163(0.978,1.382)	0.088
ARHGEF4	1.231(0.962,1.574)	0.098
ZFPM1	0.788(0.594,1.045)	0.098
LYPD6	0.768(0.561,1.051)	0.099
TMEM116	0.809(0.629,1.041)	0.1
MYL5	0.774(0.568,1.055)	0.105
GTF2IRD2	0.796(0.604,1.05)	0.106
SEMA6B	1.171(0.962,1.425)	0.115
SLC24A3	1.149(0.964,1.369)	0.122
ZNF763	0.782(0.566,1.081)	0.137
ACSF3	0.839(0.662,1.063)	0.146
NECAB3	1.207(0.934,1.56)	0.151
CD300LG	1.309(0.905,1.892)	0.153
GLI4	0.823(0.625,1.084)	0.165
ZNF444	0.836(0.645,1.085)	0.178
IRF2BP1	0.84(0.652,1.083)	0.179
MTSS1	1.215(0.914,1.616)	0.18
PARP10	0.836(0.641,1.091)	0.188
C14orf93	1.144(0.936,1.398)	0.189
ROBO4	1.175(0.924,1.493)	0.189
DPT	1.111(0.949,1.301)	0.19
TAF13	1.131(0.94,1.362)	0.192
CUZD1	0.825(0.617,1.104)	0.196
ADAMTS9	1.167(0.922,1.476)	0.199
ANKRD10	0.832(0.627,1.105)	0.204
ADAMTS4	1.166(0.918,1.481)	0.209
ZNF709	0.77(0.512,1.159)	0.211
COL3A1	1.158(0.917,1.463)	0.216
ARL4D	1.138(0.927,1.396)	0.217
DUSP28	0.862(0.681,1.091)	0.217
ZNF580	0.844(0.644,1.106)	0.22
P2RY2	1.136(0.92,1.403)	0.237
FITM1	0.843(0.634,1.122)	0.242
AADAT	0.879(0.705,1.095)	0.25
ZNF20	0.841(0.62,1.139)	0.262
SVEP1	1.224(0.86,1.741)	0.262
ANXA1	1.102(0.929,1.307)	0.264
CRISPLD2	1.155(0.895,1.49)	0.269
CREG2	1.124(0.911,1.387)	0.277
SPHK1	1.111(0.916,1.348)	0.285
HINT2	1.106(0.918,1.332)	0.291
SGF29	0.834(0.595,1.169)	0.292
TNFAIP6	1.143(0.889,1.469)	0.297
UPF3A	1.136(0.894,1.443)	0.299
MVB12B	0.866(0.658,1.141)	0.308
DPM3	0.864(0.649,1.15)	0.315
RPAIN	0.876(0.677,1.134)	0.316
CD44	1.09(0.92,1.291)	0.318
CORT	0.859(0.637,1.159)	0.32
TEX22	0.877(0.672,1.144)	0.332
SPIRE2	0.876(0.667,1.15)	0.339
ARL16	1.128(0.881,1.443)	0.34
TUSC1	0.888(0.695,1.134)	0.341
ITGAX	0.842(0.59,1.203)	0.345
LRTOMT	1.092(0.904,1.319)	0.36
SDS	1.108(0.888,1.381)	0.364
CLIP1	1.113(0.882,1.404)	0.369
COX4I1	0.876(0.657,1.169)	0.37
RPP25L	0.874(0.65,1.174)	0.371
SLC11A1	1.101(0.89,1.362)	0.374
KLHDC4	0.873(0.643,1.185)	0.383
DEGS1	1.077(0.911,1.274)	0.383
ZNF620	0.893(0.692,1.152)	0.384
AQP9	1.122(0.865,1.455)	0.387
GNMT	0.858(0.606,1.215)	0.388
C7orf31	0.908(0.728,1.133)	0.393
BDKRB2	1.086(0.898,1.313)	0.394
RPL28	0.891(0.68,1.166)	0.401
ADGRL4	1.094(0.883,1.355)	0.412
UQCRQ	0.891(0.675,1.176)	0.414
C1orf56	1.077(0.9,1.289)	0.419
TRMT10B	0.907(0.71,1.16)	0.438
ADGRG3	1.144(0.811,1.612)	0.444
HLA-C	0.911(0.717,1.158)	0.447
PDK4	1.092(0.855,1.396)	0.48
BDKRB1	0.83(0.493,1.397)	0.483
DPH7	0.916(0.713,1.175)	0.489
BLOC1S1	0.89(0.635,1.249)	0.501
OLFML3	1.068(0.875,1.302)	0.517
RASIP1	0.933(0.754,1.155)	0.525
NDUFA3	0.911(0.682,1.215)	0.525
COQ4	0.929(0.734,1.174)	0.535
SH3GLB2	0.92(0.702,1.206)	0.546
ZNF22	0.935(0.751,1.164)	0.547
FAM229A	0.925(0.718,1.193)	0.549
PRICKLE2	1.079(0.842,1.382)	0.55
ITPRIP	1.075(0.837,1.381)	0.571
LYRM9	1.083(0.821,1.427)	0.573
VANGL1	1.049(0.887,1.242)	0.575
RFX3	0.912(0.659,1.261)	0.577
SPATA21	1.048(0.879,1.25)	0.602
BICD2	1.06(0.847,1.326)	0.61
S1PR1	1.072(0.82,1.401)	0.612
SIVA1	0.945(0.758,1.179)	0.617
OR13A1	0.946(0.761,1.178)	0.621
XRCC3	0.95(0.775,1.166)	0.626
THYN1	0.94(0.732,1.208)	0.63
SPAG8	0.946(0.742,1.205)	0.651
TRIB3	1.034(0.889,1.204)	0.662
ACP7	1.046(0.854,1.282)	0.664
PTHLH	0.955(0.775,1.177)	0.664
PECAM1	1.047(0.851,1.288)	0.665
KRT6B	0.95(0.751,1.202)	0.669
MSH5-SAPCD1	0.951(0.756,1.198)	0.671
SBSN	1.04(0.865,1.25)	0.677
LGI4	1.044(0.852,1.278)	0.68
PTGFRN	1.044(0.847,1.287)	0.688
FHL5	1.064(0.78,1.45)	0.695
FHOD1	0.954(0.752,1.209)	0.696
ZNF32	0.954(0.746,1.22)	0.706
NDUFA4	1.046(0.827,1.324)	0.707
RPL13	0.954(0.747,1.219)	0.708
GPR1	1.031(0.87,1.222)	0.726
MXD3	1.033(0.84,1.271)	0.757
ERG	0.958(0.718,1.279)	0.771
ING1	1.031(0.829,1.284)	0.782
ABHD14A	0.97(0.763,1.232)	0.802
CCDC61	0.971(0.769,1.227)	0.808
ZNF428	1.023(0.846,1.236)	0.816
NUDT14	1.026(0.815,1.291)	0.825
FXYD1	1.02(0.847,1.227)	0.836
PACS2	0.98(0.775,1.239)	0.864
ACSS1	1.017(0.818,1.263)	0.882
ECI1	0.981(0.766,1.257)	0.882
CATSPERG	0.985(0.786,1.234)	0.896
MCM3	1.012(0.821,1.247)	0.915
GALNT6	1.011(0.832,1.227)	0.916
IPPK	0.996(0.805,1.232)	0.969
COL13A1	0.995(0.773,1.282)	0.971
ZNF711	1.003(0.775,1.298)	0.982
