# Supplementary material for: A novel 6-gene signature derived from tumor-infiltrating T cells and neutrophils predicts survival of bladder urothelial carcinoma
Source: Aging (Albany NY). 2021 Dec 14;13(23):25496–517. doi: 10.18632/aging.203770 (PMC8714163; doi:10.18632/aging.203770)
Supplement: Supplementary Table 4.1 [file aging-13-203770-s005.xlsx]

## Sheet: Supplementary Table 4.1
Supplementary Table 4.1. Significant pathways enriched in high-risk bladder cancer patients of the TCGA-BLCA cohort.
KEGG Pathway	Size	ES	NES	NOM p-val	FDR q-val		GO biological process (BP) annotation	Size	ES	NES	NOM p-val	FDR q-val		GO molecular function (MF) annotation	Size	ES	NES	NOM p-val	FDR q-val		GO cellular component (CC) annotation	Size	ES	NES	NOM p-val	FDR q-val
KEGG_ECM_RECEPTOR_INTERACTION	84	0.675524	2.87028	0	0		GO_ENDODERM_FORMATION	50	0.672118	2.8745	0	0		GO_EXOGENOUS_PROTEIN_BINDING	74	0.569629	3.18113	0	0		GO_CELL_SUBSTRATE_JUNCTION	405	0.5171	2.55315	0	0
KEGG_GLYCOSAMINOGLYCAN_BIOSYNTHESIS_CHONDROITIN_SULFATE	22	0.62329	2.66795	0	0		GO_POSITIVE_REGULATION_OF_EPITHELIAL_TO_MESENCHYMAL_TRANSITION	47	0.583939	2.80726	0	0		GO_PROTEASE_BINDING	123	0.577752	2.89869	0	0		GO_FICOLIN_1_RICH_GRANULE_MEMBRANE	60	0.662787	2.52151	0	0
KEGG_FOCAL_ADHESION	199	0.578427	2.45582	0	0		GO_ENDODERM_DEVELOPMENT	74	0.579398	2.72843	0	0		GO_LOW_DENSITY_LIPOPROTEIN_PARTICLE_BINDING	16	0.712095	2.74349	0	0		GO_PIGMENT_GRANULE	104	0.524884	2.4068	0	0
KEGG_CYTOKINE_CYTOKINE_RECEPTOR_INTERACTION	262	0.496795	2.26105	0	0		GO_CELL_JUNCTION_ORGANIZATION	286	0.499318	2.71842	0	0		GO_CYTOKINE_BINDING	127	0.57171	2.66143	0	0		GO_ACTIN_FILAMENT_BUNDLE	62	0.548336	2.40106	0	0
KEGG_COMPLEMENT_AND_COAGULATION_CASCADES	69	0.521685	2.25704	0	0		GO_POSITIVE_REGULATION_OF_MUSCLE_CONTRACTION	44	0.44325	2.63096	0	0		GO_CHEMOKINE_BINDING	32	0.619824	2.52217	0	0		GO_COPII_COATED_ER_TO_GOLGI_TRANSPORT_VESICLE	89	0.55119	2.33543	0	0.019
KEGG_PRION_DISEASES	35	0.525291	2.04835	0	0		GO_POSITIVE_REGULATION_OF_SMOOTH_MUSCLE_CONTRACTION	31	0.530805	2.59218	0	0		GO_CYTOKINE_RECEPTOR_ACTIVITY	95	0.519544	2.4284	0	0		GO_PLATELET_ALPHA_GRANULE_MEMBRANE	17	0.625092	2.36608	0	0.0228
KEGG_TOLL_LIKE_RECEPTOR_SIGNALING_PATHWAY	102	0.421498	1.91306	0	0.0100877		GO_POSITIVE_REGULATION_OF_ACTIN_FILAMENT_BUNDLE_ASSEMBLY	61	0.530785	2.57593	0	0		GO_GROWTH_FACTOR_BINDING	131	0.509818	2.36525	0	0		GO_AZUROPHIL_GRANULE	153	0.490915	2.07056	0	0.048169
KEGG_PATHWAYS_IN_CANCER	325	0.374441	1.9196	0	0.0110048		GO_REGULATION_OF_CHONDROCYTE_DIFFERENTIATION	46	0.560454	2.55234	0	0		GO_CHEMOKINE_RECEPTOR_BINDING	63	0.586014	2.35475	0	0		GO_ER_TO_GOLGI_TRANSPORT_VESICLE_MEMBRANE	58	0.541744	2.01243	0	0.0499352
KEGG_PANCREATIC_CANCER	70	0.463123	1.93419	0	0.0121053		GO_POSITIVE_REGULATION_OF_STRESS_FIBER_ASSEMBLY	51	0.564402	2.51196	0	0		GO_GDP_BINDING	59	0.492598	2.25568	0	0
KEGG_NOD_LIKE_RECEPTOR_SIGNALING_PATHWAY	62	0.499092	1.96562	0	0.0134503		GO_CELL_MATRIX_ADHESION	217	0.505294	2.47655	0	0		GO_IMMUNOGLOBULIN_BINDING	22	0.688402	2.21303	0	0
KEGG_CHEMOKINE_SIGNALING_PATHWAY	186	0.464013	2.0049	0	0.0151316		GO_NEGATIVE_REGULATION_OF_CARTILAGE_DEVELOPMENT	26	0.653818	2.47527	0	0		GO_EXTRACELLULAR_MATRIX_BINDING	55	0.617674	2.20486	0	0
KEGG_REGULATION_OF_ACTIN_CYTOSKELETON	212	0.52027	2.01592	0	0.0172932		GO_SUBSTRATE_ADHESION_DEPENDENT_CELL_SPREADING	87	0.541604	2.47378	0	0		GO_CELL_ADHESION_MOLECULE_BINDING	478	0.502933	2.1755	0	0
KEGG_PATHOGENIC_ESCHERICHIA_COLI_INFECTION	55	0.572109	1.90264	0	0.0175792		GO_REGULATION_OF_KERATINOCYTE_PROLIFERATION	29	0.542617	2.47207	0	0		GO_CADHERIN_BINDING	320	0.48943	2.17426	0	0
KEGG_RENAL_CELL_CARCINOMA	70	0.467348	1.82098	0	0.0189427		GO_EXTRACELLULAR_STRUCTURE_ORGANIZATION	414	0.539639	2.45984	0	0		GO_CELL_ADHESION_MEDIATOR_ACTIVITY	59	0.598896	2.12998	0	0
KEGG_MELANOMA	71	0.483888	1.86444	0	0.0201266		GO_FORMATION_OF_PRIMARY_GERM_LAYER	115	0.502913	2.45473	0	0		GO_LIPOPOLYSACCHARIDE_BINDING	34	0.53346	2.12191	0	0
KEGG_COLORECTAL_CANCER	62	0.369736	1.88165	0	0.0214683		GO_REGULATION_OF_CARTILAGE_DEVELOPMENT	64	0.537145	2.45457	0	0		GO_STRUCTURAL_CONSTITUENT_OF_CYTOSKELETON	98	0.457195	2.10069	0	0
KEGG_HEMATOPOIETIC_CELL_LINEAGE	85	0.510886	1.88533	0	0.0230018		GO_NEGATIVE_REGULATION_OF_CHONDROCYTE_DIFFERENTIATION	20	0.65865	2.43252	0	0		GO_LOW_DENSITY_LIPOPROTEIN_PARTICLE_RECEPTOR_BINDING	21	0.511035	2.08381	0	0
KEGG_EPITHELIAL_CELL_SIGNALING_IN_HELICOBACTER_PYLORI_INFECTION	68	0.407288	1.80253	0	0.0246154		GO_ACTIN_FILAMENT_BUNDLE_ORGANIZATION	149	0.448479	2.41448	0	0		GO_PROTEOGLYCAN_BINDING	36	0.625524	2.08126	0	0
KEGG_HYPERTROPHIC_CARDIOMYOPATHY_HCM	83	0.491775	1.75875	0.2	0.0446919		GO_CHONDROCYTE_DIFFERENTIATION	116	0.547464	2.40819	0	0		GO_LIPASE_INHIBITOR_ACTIVITY	16	0.626732	2.06517	0	0
KEGG_ENDOMETRIAL_CANCER	52	0.414913	1.75936	0	0.0470441		GO_CARTILAGE_DEVELOPMENT	202	0.479434	2.39977	0	0		GO_TRANSFORMING_GROWTH_FACTOR_BETA_BINDING	22	0.644042	2.05975	0	0
							GO_EPIBOLY	30	0.64472	2.37753	0	0		GO_AMYLOID_BETA_BINDING	76	0.456222	2.04402	0	0
							GO_CHONDROITIN_SULFATE_BIOSYNTHETIC_PROCESS	26	0.711907	2.3515	0	0		GO_GROWTH_FACTOR_RECEPTOR_BINDING	133	0.44841	2.02883	0	0
							GO_CELL_SUBSTRATE_JUNCTION_ASSEMBLY	96	0.589002	2.3352	0	0		GO_SODIUM_CHANNEL_REGULATOR_ACTIVITY	34	0.408607	2.02461	0	0
							GO_REGULATION_OF_NEURON_PROJECTION_REGENERATION	29	0.591939	2.31821	0	0		GO_FIBRONECTIN_BINDING	26	0.64241	2.01964	0	0
							GO_POLYSACCHARIDE_METABOLIC_PROCESS	106	0.437985	2.31737	0	0		GO_LAMININ_BINDING	29	0.600606	2.01488	0	0
							GO_POSITIVE_REGULATION_OF_CELL_SUBSTRATE_ADHESION	117	0.504802	2.3141	0	0		GO_COLLAGEN_BINDING	66	0.633961	2.00478	0	0
							GO_CARTILAGE_DEVELOPMENT_INVOLVED_IN_ENDOCHONDRAL_BONE_MORPHOGENESIS	46	0.531327	2.31233	0	0		GO_CADHERIN_BINDING_INVOLVED_IN_CELL_CELL_ADHESION	19	0.801172	1.98966	0	0
							GO_POSITIVE_REGULATION_OF_CELL_JUNCTION_ASSEMBLY	33	0.666755	2.29882	0	0		GO_CCR_CHEMOKINE_RECEPTOR_BINDING	40	0.562491	1.98272	0	0
							GO_RESPONSE_TO_VITAMIN_D	36	0.449753	2.29659	0	0		GO_C_C_CHEMOKINE_BINDING	24	0.555159	1.98038	0	0
							GO_REGULATION_OF_CARDIAC_MUSCLE_CELL_ACTION_POTENTIAL	28	0.554911	2.28046	0	0		GO_INTEGRIN_BINDING	121	0.558437	1.96668	0	0
							GO_ASTROCYTE_DEVELOPMENT	38	0.589339	2.2759	0	0		GO_MAP_KINASE_PHOSPHATASE_ACTIVITY	15	0.648047	1.96422	0	0
							GO_REGULATION_OF_MEMBRANE_PROTEIN_ECTODOMAIN_PROTEOLYSIS	23	0.73468	2.2663	0	0		GO_MANNOSE_BINDING	22	0.529919	1.79474	0	0.00367037
							GO_REGULATION_OF_CELL_SUBSTRATE_ADHESION	205	0.472054	2.26436	0	0		GO_TRANSMEMBRANE_RECEPTOR_PROTEIN_TYROSINE_KINASE_ACTIVITY	62	0.442827	1.79559	0	0.00374683
							GO_NEGATIVE_REGULATION_OF_CELL_SUBSTRATE_ADHESION	61	0.458284	2.25474	0	0		GO_FIBROBLAST_GROWTH_FACTOR_BINDING	23	0.409306	1.79926	0	0.00382655
							GO_ENTRY_INTO_OTHER_ORGANISM_INVOLVED_IN_SYMBIOTIC_INTERACTION	134	0.512728	2.2528	0	0		GO_GLYCOSAMINOGLYCAN_BINDING	214	0.450644	1.80059	0	0.00390974
							GO_CONNECTIVE_TISSUE_DEVELOPMENT	262	0.449064	2.25277	0	0		GO_LIPOPROTEIN_PARTICLE_RECEPTOR_BINDING	26	0.522067	1.80617	0	0.00399662
							GO_REGULATION_OF_ACTOMYOSIN_STRUCTURE_ORGANIZATION	87	0.45302	2.25103	0	0		GO_CYSTEINE_TYPE_ENDOPEPTIDASE_INHIBITOR_ACTIVITY	57	0.439432	1.8154	0	0.00408745
							GO_GROWTH_PLATE_CARTILAGE_DEVELOPMENT	35	0.577132	2.25071	0	0		GO_PROTEIN_DISULFIDE_OXIDOREDUCTASE_ACTIVITY	23	0.367352	1.84692	0	0.00418251
							GO_RECEPTOR_CATABOLIC_PROCESS	33	0.602828	2.24656	0	0		GO_CYTOKINE_RECEPTOR_BINDING	281	0.350449	1.85056	0	0.00428209
							GO_REGULATION_OF_EPITHELIAL_TO_MESENCHYMAL_TRANSITION	83	0.471929	2.24616	0	0		GO_MONOSACCHARIDE_BINDING	75	0.414476	1.85436	0	0.00438653
							GO_POSITIVE_REGULATION_OF_ADHERENS_JUNCTION_ORGANIZATION	31	0.68658	2.24572	0	0		GO_PATTERN_RECOGNITION_RECEPTOR_ACTIVITY	21	0.671666	1.86194	0	0.0044962
							GO_POSITIVE_REGULATION_OF_VASCULATURE_DEVELOPMENT	178	0.538976	2.23693	0	0		GO_CARBOHYDRATE_BINDING	267	0.391684	1.86969	0	0.00461149
							GO_CARDIAC_EPITHELIAL_TO_MESENCHYMAL_TRANSITION	31	0.560304	2.23577	0	0		GO_PROTEIN_LIPID_COMPLEX_BINDING	28	0.584876	1.88822	0	0.00473284
							GO_ZINC_ION_HOMEOSTASIS	37	0.565252	2.23311	0	0		GO_PHOSPHATIDYLSERINE_BINDING	56	0.444297	1.89612	0	0.00486075
							GO_EPITHELIAL_TO_MESENCHYMAL_TRANSITION	131	0.438528	2.21462	0	0		GO_CELL_CELL_ADHESION_MEDIATOR_ACTIVITY	50	0.626066	1.90663	0	0.00499578
							GO_REGULATION_OF_CELL_JUNCTION_ASSEMBLY	88	0.554664	2.21283	0	0		GO_PEPTIDASE_REGULATOR_ACTIVITY	214	0.422335	1.90683	0	0.00513851
							GO_POSITIVE_REGULATION_OF_CELL_MATRIX_ADHESION	50	0.581054	2.20939	0	0		GO_G_PROTEIN_COUPLED_CHEMOATTRACTANT_RECEPTOR_ACTIVITY	26	0.530784	1.91543	0	0.00528964
							GO_BONE_MORPHOGENESIS	111	0.435679	2.20113	0	0		GO_APOLIPOPROTEIN_BINDING	17	0.538695	1.93012	0	0.00544994
							GO_MEMBRANE_PROTEIN_ECTODOMAIN_PROTEOLYSIS	42	0.592282	2.20102	0	0		GO_CHEMOKINE_ACTIVITY	47	0.559091	1.95146	0	0.00562025
							GO_CHONDROCYTE_DEVELOPMENT	47	0.614292	2.19979	0	0		GO_HYALURONIC_ACID_BINDING	21	0.593154	1.7825	0	0.00663868
							GO_CHONDROCYTE_DIFFERENTIATION_INVOLVED_IN_ENDOCHONDRAL_BONE_MORPHOGENESIS	30	0.562627	2.18482	0	0		GO_ALCOHOL_BINDING	84	0.390244	1.79078	0	0.00677145
							GO_REGULATION_OF_CELL_SHAPE	145	0.523903	2.1799	0	0		GO_CHAPERONE_BINDING	101	0.316731	1.76363	0	0.00920921
							GO_NEGATIVE_REGULATION_OF_CELL_MIGRATION_INVOLVED_IN_SPROUTING_ANGIOGENESIS	15	0.733401	2.1793	0	0		GO_PHOSPHATIDYLINOSITOL_3_4_5_TRISPHOSPHATE_BINDING	39	0.546717	1.7665	0	0.00938297
							GO_CELL_ADHESION_MEDIATED_BY_INTEGRIN	67	0.590121	2.17904	0	0		GO_NITRIC_OXIDE_SYNTHASE_BINDING	15	0.57232	1.77713	0	0.00956342
							GO_REGULATION_OF_HOMOTYPIC_CELL_CELL_ADHESION	24	0.470207	2.1705	0	0		GO_INSULIN_LIKE_GROWTH_FACTOR_BINDING	22	0.637586	1.73616	0	0.0112858
							GO_SPROUTING_ANGIOGENESIS	112	0.512439	2.1691	0	0		GO_EXTRACELLULAR_MATRIX_STRUCTURAL_CONSTITUENT	161	0.549025	1.74052	0	0.011477
							GO_CELL_SUBSTRATE_ADHESION	332	0.474414	2.16776	0	0		GO_G_PROTEIN_ALPHA_SUBUNIT_BINDING	22	0.55766	1.74392	0	0.0116749
							GO_REGULATION_OF_CELL_MATRIX_ADHESION	114	0.513656	2.16655	0	0		GO_STEROL_BINDING	55	0.44222	1.74646	0	0.0118797
							GO_POSITIVE_REGULATION_OF_FOCAL_ADHESION_ASSEMBLY	25	0.708935	2.16425	0	0		GO_WIDE_PORE_CHANNEL_ACTIVITY	21	0.564748	1.74892	0	0.0120919
							GO_ENDOTHELIAL_CELL_DEVELOPMENT	58	0.49847	2.15924	0	0		GO_PEPTIDOGLYCAN_BINDING	16	0.747891	1.75783	0	0.0123117
							GO_PROTEIN_CATABOLIC_PROCESS_IN_THE_VACUOLE	15	0.546478	2.15068	0	0		GO_CARGO_RECEPTOR_ACTIVITY	86	0.44005	1.73223	0	0.0125244
							GO_KERATINOCYTE_PROLIFERATION	39	0.564671	2.14497	0	0		GO_ENDOPEPTIDASE_REGULATOR_ACTIVITY	177	0.451348	1.72444	0	0.0127171
							GO_INTEGRIN_MEDIATED_SIGNALING_PATHWAY	97	0.525558	2.14487	0	0		GO_NUCLEOTIDE_RECEPTOR_ACTIVITY	21	0.579111	1.73344	0	0.0127298
							GO_FIBROBLAST_APOPTOTIC_PROCESS	19	0.639981	2.13739	0	0		GO_DISULFIDE_OXIDOREDUCTASE_ACTIVITY	40	0.385741	1.7256	0	0.0129069
							GO_LOW_DENSITY_LIPOPROTEIN_RECEPTOR_PARTICLE_METABOLIC_PROCESS	22	0.550319	2.13685	0	0		GO_PLATELET_DERIVED_GROWTH_FACTOR_RECEPTOR_BINDING	15	0.703891	1.72588	0	0.0131024
							GO_REGULATION_OF_VASCULATURE_DEVELOPMENT	309	0.49111	2.13624	0	0		GO_ANTIGEN_BINDING	53	0.455849	1.72593	0.125	0.013304
							GO_CHONDROITIN_SULFATE_PROTEOGLYCAN_BIOSYNTHETIC_PROCESS	31	0.63572	2.13337	0	0		GO_CORECEPTOR_ACTIVITY	44	0.56416	1.72789	0	0.0135119
							GO_PODOSOME_ASSEMBLY	19	0.645145	2.13252	0	0		GO_POLYPEPTIDE_N_ACETYLGALACTOSAMINYLTRANSFERASE_ACTIVITY	19	0.560021	1.71861	0	0.0136157
							GO_REGENERATION	183	0.407016	2.12145	0	0		GO_HEPARIN_BINDING	156	0.41704	1.73061	0	0.0137264
							GO_REGULATION_OF_SYNCYTIUM_FORMATION_BY_PLASMA_MEMBRANE_FUSION	29	0.624569	2.12083	0	0		GO_ACETYLGALACTOSAMINYLTRANSFERASE_ACTIVITY	47	0.527025	1.7111	0	0.0155463
							GO_REGULATION_OF_MYOBLAST_FUSION	21	0.651055	2.12015	0	0		GO_CATION_CHLORIDE_SYMPORTER_ACTIVITY	16	0.500783	1.71355	0	0.0157653
							GO_POSITIVE_REGULATION_OF_SUPRAMOLECULAR_FIBER_ORGANIZATION	198	0.42358	2.11701	0	0		GO_ENZYME_INHIBITOR_ACTIVITY	362	0.333507	1.71594	0	0.0159905
							GO_REGULATION_OF_SPROUTING_ANGIOGENESIS	67	0.525726	2.11501	0	0		GO_PURINERGIC_RECEPTOR_ACTIVITY	24	0.58074	1.70035	0	0.0163569
							GO_ADHERENS_JUNCTION_ASSEMBLY	89	0.528849	2.10512	0	0		GO_GTP_DEPENDENT_PROTEIN_BINDING	21	0.465953	1.68302	0	0.021026
							GO_RESPONSE_TO_GONADOTROPIN	28	0.494955	2.10401	0	0		GO_OXIDOREDUCTASE_ACTIVITY_ACTING_ON_NAD_P_H_OXYGEN_AS_ACCEPTOR	15	0.404035	1.67294	0	0.0211753
							GO_CONTRACTILE_ACTIN_FILAMENT_BUNDLE_ASSEMBLY	91	0.422852	2.10217	0	0		GO_MHC_PROTEIN_BINDING	30	0.49087	1.68659	0	0.0213102
							GO_ENDOCHONDRAL_BONE_MORPHOGENESIS	71	0.489415	2.09857	0	0		GO_PROTEIN_CONTAINING_COMPLEX_SCAFFOLD_ACTIVITY	78	0.442721	1.67783	0	0.0214503
							GO_TOLL_LIKE_RECEPTOR_4_SIGNALING_PATHWAY	34	0.636367	2.09633	0	0		GO_QUATERNARY_AMMONIUM_GROUP_BINDING	26	0.462282	1.66134	0	0.0214805
							GO_TRANSFORMING_GROWTH_FACTOR_BETA_PRODUCTION	37	0.594333	2.08921	0	0		GO_METALLOENDOPEPTIDASE_ACTIVITY	100	0.435137	1.68079	0	0.0217326
							GO_COLLAGEN_FIBRIL_ORGANIZATION	49	0.679013	2.08681	0	0		GO_PEPTIDE_RECEPTOR_ACTIVITY	150	0.313239	1.66425	0	0.021749
							GO_REGULATION_OF_MACROPHAGE_DIFFERENTIATION	21	0.577442	2.08475	0	0		GO_OXIDOREDUCTASE_ACTIVITY_ACTING_ON_A_SULFUR_GROUP_OF_DONORS	58	0.373468	1.66754	0	0.0220243
							GO_INTERLEUKIN_6_PRODUCTION	136	0.558292	2.08059	0	0		GO_ACTIN_FILAMENT_BINDING	188	0.434201	1.64633	0	0.0343273
							GO_REGULATION_OF_TOLL_LIKE_RECEPTOR_4_SIGNALING_PATHWAY	20	0.625132	2.07936	0	0		GO_LIPOPROTEIN_PARTICLE_RECEPTOR_ACTIVITY	15	0.573758	1.64663	0	0.0347459
							GO_NEGATIVE_REGULATION_OF_LEUKOCYTE_APOPTOTIC_PROCESS	49	0.480857	2.07687	0	0		GO_FAD_BINDING	30	0.348367	1.64162	0	0.0370418
							GO_ESTABLISHMENT_OR_MAINTENANCE_OF_CYTOSKELETON_POLARITY	16	0.619135	2.0746	0	0		GO_PROTEIN_SERINE_THREONINE_KINASE_ACTIVATOR_ACTIVITY	29	0.45367	1.62764	0	0.0438741
							GO_NEGATIVE_REGULATION_OF_EPITHELIAL_CELL_MIGRATION	65	0.496487	2.07424	0	0
							GO_HOMOTYPIC_CELL_CELL_ADHESION	77	0.514338	2.06783	0	0
							GO_REGULATION_OF_EXTRACELLULAR_MATRIX_ORGANIZATION	38	0.659853	2.06748	0	0
							GO_SYNCYTIUM_FORMATION	54	0.525762	2.06679	0	0
							GO_NEGATIVE_REGULATION_OF_LIPASE_ACTIVITY	17	0.635668	2.0647	0	0
							GO_CELL_MIGRATION_INVOLVED_IN_SPROUTING_ANGIOGENESIS	54	0.542659	2.06343	0	0
							GO_CELL_JUNCTION_ASSEMBLY	237	0.49815	2.05631	0	0
							GO_CELL_AGGREGATION	20	0.632498	2.05483	0	0
							GO_OSSIFICATION	370	0.373905	2.05447	0	0
							GO_AMINOGLYCAN_BIOSYNTHETIC_PROCESS	112	0.523704	2.05231	0	0
							GO_AMINOGLYCAN_METABOLIC_PROCESS	133	0.482421	2.0494	0	0
							GO_REGULATION_OF_ADHERENS_JUNCTION_ORGANIZATION	67	0.574607	2.04879	0	0
							GO_ADHERENS_JUNCTION_ORGANIZATION	140	0.511544	2.04875	0	0
							GO_ASTROCYTE_DIFFERENTIATION	75	0.475753	2.04805	0	0
							GO_REGULATION_OF_ACTIN_FILAMENT_BASED_PROCESS	369	0.396589	2.04786	0	0
							GO_OSTEOCLAST_DIFFERENTIATION	94	0.4708	2.04619	0	0
							GO_POSITIVE_REGULATION_OF_G1_S_TRANSITION_OF_MITOTIC_CELL_CYCLE	36	0.418357	2.04409	0	0
							GO_MUSCLE_CELL_PROLIFERATION	184	0.417216	2.03864	0	0
							GO_REGULATION_OF_SUBSTRATE_ADHESION_DEPENDENT_CELL_SPREADING	50	0.505365	2.03751	0	0
							GO_REGULATION_OF_ACTIN_FILAMENT_BUNDLE_ASSEMBLY	91	0.442625	2.03513	0	0
							GO_REGULATION_OF_MORPHOGENESIS_OF_AN_EPITHELIUM	176	0.354468	2.03501	0	0
							GO_NEGATIVE_REGULATION_OF_TRANSMEMBRANE_RECEPTOR_PROTEIN_SERINE_THREONINE_KINASE_SIGNALING_PATHWAY	112	0.428361	2.03138	0	0
							GO_ACTOMYOSIN_STRUCTURE_ORGANIZATION	184	0.408998	2.02285	0	0
							GO_REGULATION_OF_PODOSOME_ASSEMBLY	15	0.676704	2.01846	0	0
							GO_BONE_REMODELING	84	0.382768	2.01586	0	0
							GO_POSITIVE_REGULATION_OF_SMOOTH_MUSCLE_CELL_MIGRATION	36	0.584266	2.01573	0	0
							GO_ACTIN_CYTOSKELETON_REORGANIZATION	98	0.45181	2.01426	0	0
							GO_NEGATIVE_REGULATION_OF_INTERFERON_GAMMA_PRODUCTION	32	0.529976	2.01368	0	0
							GO_LEUKOCYTE_MIGRATION	421	0.460579	2.01158	0	0
							GO_POSITIVE_REGULATION_OF_EXTRACELLULAR_MATRIX_ORGANIZATION	21	0.689629	2.00962	0	0
							GO_NEGATIVE_REGULATION_OF_VASCULATURE_DEVELOPMENT	115	0.489382	2.00867	0	0
							GO_NEGATIVE_REGULATION_OF_CELL_MOTILITY	265	0.420545	2.00566	0	0
							GO_POSITIVE_REGULATION_OF_PEPTIDYL_THREONINE_PHOSPHORYLATION	29	0.573023	2.00554	0	0
							GO_NOTOCHORD_DEVELOPMENT	19	0.530058	2.00487	0	0
							GO_GLIOGENESIS	274	0.369374	2.00368	0	0
							GO_POSITIVE_REGULATION_OF_NEURAL_PRECURSOR_CELL_PROLIFERATION	53	0.413021	1.9966	0	0
							GO_RESPONSE_TO_INTERLEUKIN_6	38	0.553487	1.99468	0	0
							GO_KERATINOCYTE_MIGRATION	19	0.67685	1.9921	0	0
							GO_REGULATION_OF_NEURAL_PRECURSOR_CELL_PROLIFERATION	85	0.410712	1.99157	0	0
							GO_APOPTOTIC_CELL_CLEARANCE	44	0.477474	1.99134	0	0
							GO_BONE_DEVELOPMENT	210	0.409246	1.99112	0	0
							GO_GRANULOCYTE_MIGRATION	133	0.558055	1.98874	0	0
							GO_TISSUE_REMODELING	156	0.411836	1.98858	0	0
							GO_CHRONIC_INFLAMMATORY_RESPONSE	18	0.679113	1.98774	0	0
							GO_NEGATIVE_REGULATION_OF_MUSCLE_HYPERTROPHY	27	0.525642	1.98521	0	0
							GO_NEGATIVE_REGULATION_OF_CALCINEURIN_MEDIATED_SIGNALING	15	0.645575	1.98458	0	0
							GO_NEURON_PROJECTION_REGENERATION	55	0.500503	1.98311	0	0
							GO_REGULATION_OF_EPIDERMAL_GROWTH_FACTOR_ACTIVATED_RECEPTOR_ACTIVITY	27	0.543939	1.98265	0	0
							GO_POSITIVE_REGULATION_OF_SMOOTH_MUSCLE_CELL_PROLIFERATION	85	0.457645	1.98241	0	0
							GO_POSITIVE_REGULATION_OF_EXTRINSIC_APOPTOTIC_SIGNALING_PATHWAY	49	0.488576	1.97956	0	0
							GO_MUSCLE_CELL_MIGRATION	78	0.501405	1.97857	0	0
							GO_POSITIVE_REGULATION_OF_SUBSTRATE_ADHESION_DEPENDENT_CELL_SPREADING	35	0.515475	1.97855	0	0
							GO_RESPONSE_TO_CHEMOKINE	94	0.542118	1.97581	0	0
							GO_CYTOKINE_SECRETION	214	0.473646	1.97265	0	0.000831
							GO_LYMPHOCYTE_CHEMOTAXIS	61	0.519981	1.97285	0	0.000836
							GO_NEGATIVE_REGULATION_OF_BLOOD_VESSEL_DIAMETER	78	0.519255	1.97338	0	0.000842
							GO_REGULATION_OF_ANIMAL_ORGAN_MORPHOGENESIS	250	0.341756	1.97505	0	0.000848
							GO_REGULATION_OF_MONONUCLEAR_CELL_MIGRATION	43	0.625368	1.97543	0	0.000854
							GO_MONONUCLEAR_CELL_MIGRATION	85	0.572088	1.92486	0	0.00135428
							GO_POSITIVE_REGULATION_OF_FIBROBLAST_PROLIFERATION	50	0.541794	1.9258	0	0.00136184
							GO_FC_RECEPTOR_MEDIATED_STIMULATORY_SIGNALING_PATHWAY	83	0.498378	1.92613	0	0.0013695
							GO_CELLULAR_RESPONSE_TO_LOW_DENSITY_LIPOPROTEIN_PARTICLE_STIMULUS	18	0.65376	1.92656	0	0.00137723
							GO_NEGATIVE_REGULATION_OF_CELL_MATRIX_ADHESION	38	0.518638	1.92705	0	0.00138506
							GO_RECEPTOR_MEDIATED_ENDOCYTOSIS	289	0.419504	1.92741	0	0.00139297
							GO_GROWTH_PLATE_CARTILAGE_CHONDROCYTE_DIFFERENTIATION	24	0.571797	1.92822	0	0.00140098
							GO_AMEBOIDAL_TYPE_CELL_MIGRATION	380	0.407795	1.92858	0	0.00140908
							GO_INTERLEUKIN_6_BIOSYNTHETIC_PROCESS	22	0.575703	1.92887	0	0.00141727
							GO_FACE_MORPHOGENESIS	32	0.51863	1.929	0	0.00142556
							GO_PLATELET_AGGREGATION	58	0.489252	1.93348	0	0.00143394
							GO_RESPONSE_TO_THYROID_HORMONE	27	0.508175	1.93565	0	0.00144243
							GO_CHEMOKINE_PRODUCTION	82	0.463065	1.93603	0	0.00145101
							GO_POSITIVE_REGULATION_OF_EPITHELIAL_CELL_MIGRATION	138	0.443736	1.93751	0	0.0014597
							GO_NEGATIVE_REGULATION_OF_RESPONSE_TO_WOUNDING	85	0.457817	1.93784	0	0.00146849
							GO_MORPHOGENESIS_OF_A_POLARIZED_EPITHELIUM	139	0.336438	1.93803	0	0.0014774
							GO_POSITIVE_REGULATION_OF_CYTOKINE_SECRETION	128	0.459864	1.93992	0	0.0014864
							GO_POSITIVE_REGULATION_OF_ANIMAL_ORGAN_MORPHOGENESIS	82	0.393751	1.93995	0	0.00149552
							GO_PLATELET_ACTIVATION	153	0.445344	1.94067	0	0.00150475
							GO_REGULATION_OF_EPITHELIAL_CELL_MIGRATION	213	0.433451	1.94152	0	0.0015141
							GO_NEGATIVE_REGULATION_OF_PEPTIDASE_ACTIVITY	244	0.431678	1.94209	0	0.00152356
							GO_I_KAPPAB_PHOSPHORYLATION	18	0.481523	1.94241	0	0.00153315
							GO_SUBSTRATE_DEPENDENT_CELL_MIGRATION	29	0.654861	1.94465	0	0.00154285
							GO_SMOOTH_MUSCLE_CELL_MIGRATION	65	0.510289	1.94765	0	0.00155268
							GO_POSITIVE_REGULATION_OF_CELL_ADHESION	394	0.4432	1.94768	0	0.00156263
							GO_MONOCYTE_CHEMOTAXIS	62	0.589769	1.9501	0	0.00157271
							GO_POSITIVE_REGULATION_OF_INFLAMMATORY_RESPONSE	134	0.480929	1.95061	0	0.00158292
							GO_RESPONSE_TO_ANGIOTENSIN	25	0.492641	1.95149	0	0.00159327
							GO_LEUKOCYTE_CHEMOTAXIS	214	0.515366	1.9516	0	0.00160375
							GO_INTERLEUKIN_1_PRODUCTION	92	0.545138	1.95236	0	0.00161437
							GO_RESPONSE_TO_DSRNA	54	0.533852	1.95315	0	0.00162513
							GO_SECONDARY_PALATE_DEVELOPMENT	24	0.49493	1.95612	0	0.00163604
							GO_POSITIVE_REGULATION_OF_ALCOHOL_BIOSYNTHETIC_PROCESS	25	0.613714	1.96211	0	0.00164709
							GO_POLYSACCHARIDE_CATABOLIC_PROCESS	27	0.461085	1.96449	0	0.0016583
							GO_MORPHOGENESIS_OF_AN_EPITHELIAL_SHEET	53	0.497603	1.96663	0	0.00166966
							GO_REGULATION_OF_SYSTEMIC_ARTERIAL_BLOOD_PRESSURE_BY_CIRCULATORY_RENIN_ANGIOTENSIN	18	0.704315	1.9667	0	0.00168117
							GO_ANGIOGENESIS_INVOLVED_IN_WOUND_HEALING	18	0.676597	1.97055	0	0.00169285
							GO_MATERNAL_PROCESS_INVOLVED_IN_FEMALE_PREGNANCY	62	0.42699	1.91049	0	0.00180368
							GO_MICROTUBULE_ORGANIZING_CENTER_LOCALIZATION	28	0.542983	1.91191	0	0.0018127
							GO_CHONDROITIN_SULFATE_PROTEOGLYCAN_METABOLIC_PROCESS	37	0.590368	1.91197	0	0.00182181
							GO_ADHESION_OF_SYMBIONT_TO_HOST	15	0.615454	1.91318	0	0.00183101
							GO_CELLULAR_RESPONSE_TO_VASCULAR_ENDOTHELIAL_GROWTH_FACTOR_STIMULUS	53	0.527659	1.91353	0	0.00184031
							GO_POSITIVE_REGULATION_OF_MACROPHAGE_MIGRATION	19	0.671278	1.91431	0	0.00184969
							GO_REGULATION_OF_GRANULOCYTE_CHEMOTAXIS	42	0.535808	1.91492	0	0.00185918
							GO_CANONICAL_WNT_SIGNALING_PATHWAY	319	0.305074	1.91579	0	0.00186876
							GO_SKELETAL_SYSTEM_MORPHOGENESIS	236	0.350102	1.9158	0	0.00187845
							GO_MONONUCLEAR_CELL_DIFFERENTIATION	35	0.491067	1.91633	0	0.00188823
							GO_LEUKOCYTE_APOPTOTIC_PROCESS	105	0.456517	1.91638	0	0.00189812
							GO_REGULATION_OF_LEUKOCYTE_APOPTOTIC_PROCESS	85	0.496808	1.91661	0	0.00190811
							GO_POSITIVE_REGULATION_OF_CYTOSKELETON_ORGANIZATION	220	0.383889	1.91721	0	0.0019182
							GO_LYMPH_NODE_DEVELOPMENT	16	0.635944	1.91761	0	0.00192841
							GO_PRODUCTION_OF_MOLECULAR_MEDIATOR_INVOLVED_IN_INFLAMMATORY_RESPONSE	62	0.419333	1.91946	0	0.00193872
							GO_NEGATIVE_REGULATION_OF_CELL_ADHESION	259	0.38154	1.91952	0	0.00194914
							GO_EXTRACELLULAR_MATRIX_DISASSEMBLY	79	0.566528	1.92019	0	0.00195968
							GO_REGULATION_OF_WNT_SIGNALING_PATHWAY	343	0.322057	1.92143	0	0.00197033
							GO_NEGATIVE_REGULATION_OF_SPROUTING_ANGIOGENESIS	24	0.575576	1.92151	0	0.00198109
							GO_BIOMINERAL_TISSUE_DEVELOPMENT	154	0.423763	1.9219	0	0.00199198
							GO_CYTOKINE_SECRETION_INVOLVED_IN_IMMUNE_RESPONSE	19	0.624624	1.92236	0	0.00200299
							GO_MEMBRANE_BIOGENESIS	35	0.504268	1.90103	0	0.00231745
							GO_POLYSACCHARIDE_BIOSYNTHETIC_PROCESS	75	0.417853	1.90257	0	0.00232865
							GO_SMOOTH_MUSCLE_CELL_PROLIFERATION	132	0.437988	1.90413	0	0.00233995
							GO_NEGATIVE_REGULATION_OF_LYMPHOCYTE_APOPTOTIC_PROCESS	31	0.410959	1.90461	0	0.00235137
							GO_POSITIVE_REGULATION_OF_VASOCONSTRICTION	30	0.584223	1.90502	0	0.0023629
							GO_ACTIN_FILAMENT_ORGANIZATION	386	0.373151	1.90797	0	0.00237454
							GO_POSITIVE_REGULATION_OF_WNT_SIGNALING_PATHWAY	170	0.350295	1.90825	0	0.00238629
							GO_POSITIVE_REGULATION_OF_SPROUTING_ANGIOGENESIS	39	0.569035	1.8811	0	0.00305089
							GO_GLUCAN_CATABOLIC_PROCESS	23	0.487189	1.88169	0	0.00306404
							GO_OSTEOBLAST_DIFFERENTIATION	200	0.332305	1.88425	0	0.0030773
							GO_NEUTROPHIL_MIGRATION	111	0.539595	1.88464	0	0.00309068
							GO_EXOCRINE_SYSTEM_DEVELOPMENT	48	0.396085	1.88717	0	0.00310418
							GO_CELLULAR_RESPONSE_TO_MECHANICAL_STIMULUS	76	0.553339	1.88723	0	0.00311779
							GO_TISSUE_MIGRATION	280	0.440523	1.88723	0	0.00313153
							GO_NEGATIVE_REGULATION_OF_CELLULAR_RESPONSE_TO_TRANSFORMING_GROWTH_FACTOR_BETA_STIMULUS	74	0.46462	1.88759	0	0.00314538
							GO_PHAGOSOME_MATURATION	44	0.491586	1.88881	0	0.00315936
							GO_BONE_RESORPTION	58	0.364824	1.8899	0	0.00317347
							GO_CHONDROCYTE_DEVELOPMENT_INVOLVED_IN_ENDOCHONDRAL_BONE_MORPHOGENESIS	24	0.54482	1.89102	0	0.0031877
							GO_REGULATION_OF_INOSITOL_PHOSPHATE_BIOSYNTHETIC_PROCESS	16	0.650244	1.89139	0	0.00320206
							GO_REGULATION_OF_PHAGOCYTOSIS	88	0.497157	1.89142	0	0.00321655
							GO_NEGATIVE_REGULATION_OF_ORGAN_GROWTH	30	0.514646	1.8924	0	0.00323117
							GO_CORTICAL_CYTOSKELETON_ORGANIZATION	45	0.447364	1.89298	0	0.00324592
							GO_BLOOD_VESSEL_ENDOTHELIAL_CELL_MIGRATION	111	0.449809	1.89309	0	0.00326081
							GO_PEPTIDE_HORMONE_PROCESSING	32	0.523147	1.89447	0	0.00327584
							GO_IRON_ION_TRANSMEMBRANE_TRANSPORT	17	0.572806	1.89474	0	0.003291
							GO_MYELOID_CELL_APOPTOTIC_PROCESS	32	0.544719	1.89569	0	0.00330631
