# Supplementary material for: A novel 6-gene signature derived from tumor-infiltrating T cells and neutrophils predicts survival of bladder urothelial carcinoma
Source: Aging (Albany NY). 2021 Dec 14;13(23):25496–517. doi: 10.18632/aging.203770 (PMC8714163; doi:10.18632/aging.203770)
Supplement: Supplementary Table 4.2 [file aging-13-203770-s006.xlsx]

## Sheet: Supplementary Table 4.2
Supplementary Table 4.2. Significant pathways enriched in low-risk bladder cancer patients of the TCGA-BLCA cohort.
KEGG Pathway	Size	ES	NES	NOM p-val	FDR q-val		GO biological process (BP) annotation	Size	ES	NES	NOM p-val	FDR q-val		GO molecular function (MF) annotation	Size	ES	NES	NOM p-val	FDR q-val		GO cellular component (CC) annotation	Size	ES	NES	NOM p-val	FDR q-val
KEGG_CARDIAC_MUSCLE_CONTRACTION	77	-0.508279	-2.41208	0	0		GO_EPITHELIAL_CILIUM_MOVEMENT	23	-0.650152	-2.86015	0	0		GO_OXIDOREDUCTASE_ACTIVITY_ACTING_ON_A_HEME_GROUP_OF_DONORS	28	-0.703112	-2.43815	0	0		GO_PRESPLICEOSOME	15	-0.803515	-2.63589	0	0
KEGG_PARKINSONS_DISEASE	125	-0.580952	-2.04198	0	0		GO_RNA_SPLICING	423	-0.50366	-2.63431	0	0									GO_CILIARY_TIP	45	-0.550829	-2.6104	0	0
KEGG_VALINE_LEUCINE_AND_ISOLEUCINE_DEGRADATION	43	-0.526722	-2.01082	0	0		GO_REGULATION_OF_MRNA_PROCESSING	136	-0.478014	-2.59719	0	0									GO_INTRACILIARY_TRANSPORT_PARTICLE	28	-0.660346	-2.30706	0	0
KEGG_FATTY_ACID_METABOLISM	42	-0.462482	-1.99887	0	0		GO_MRNA_CIS_SPLICING_VIA_SPLICEOSOME	34	-0.648624	-2.51107	0	0									GO_SPLICEOSOMAL_COMPLEX	175	-0.550251	-2.15456	0	0
KEGG_PEROXISOME	78	-0.45094	-1.97067	0	0		GO_MRNA_3_END_PROCESSING	98	-0.465811	-2.48201	0	0									GO_CYTOCHROME_COMPLEX	31	-0.72094	-2.12919	0	0
KEGG_OXIDATIVE_PHOSPHORYLATION	129	-0.568237	-1.91227	0	0.0126506		GO_RNA_SPLICING_VIA_TRANSESTERIFICATION_REACTIONS	336	-0.513953	-2.44574	0	0									GO_SM_LIKE_PROTEIN_FAMILY_COMPLEX	75	-0.559506	-2.12596	0	0
KEGG_BUTANOATE_METABOLISM	34	-0.400589	-1.77111	0	0.0248137		GO_RNA_METHYLATION	78	-0.535145	-2.39782	0	0									GO_ENDONUCLEASE_COMPLEX	29	-0.584302	-2.10831	0	0
KEGG_HUNTINGTONS_DISEASE	177	-0.465915	-1.79689	0	0.0279154		GO_TRNA_MODIFICATION	85	-0.513756	-2.37483	0	0									GO_RESPIRASOME	98	-0.670293	-2.04494	0	0
KEGG_BASE_EXCISION_REPAIR	33	-0.514435	-1.73401	0	0.0283323		GO_PREASSEMBLY_OF_GPI_ANCHOR_IN_ER_MEMBRANE	17	-0.640727	-2.37378	0	0									GO_OXIDOREDUCTASE_COMPLEX	111	-0.556042	-2.04378	0	0
KEGG_ALZHEIMERS_DISEASE	163	-0.385954	-1.79916	0	0.0319033		GO_SPLICEOSOMAL_COMPLEX_ASSEMBLY	56	-0.582687	-2.35044	0	0									GO_CENTRIOLAR_SATELLITE	29	-0.549316	-2.04034	0	0
							GO_REGULATION_OF_MRNA_SPLICING_VIA_SPLICEOSOME	98	-0.484192	-2.30677	0	0									GO_RESPIRATORY_CHAIN_COMPLEX	84	-0.687773	-2.02431	0	0
							GO_REGULATION_OF_RNA_SPLICING	134	-0.438505	-2.29765	0	0									GO_PROTON_TRANSPORTING_ATP_SYNTHASE_COMPLEX	21	-0.684102	-1.98089	0	0.0242537
							GO_NUCLEAR_TRANSCRIBED_MRNA_CATABOLIC_PROCESS	202	-0.466604	-2.28432	0	0									GO_INO80_TYPE_COMPLEX	24	-0.52346	-1.98813	0	0.0262748
							GO_POSITIVE_REGULATION_OF_RNA_SPLICING	35	-0.489543	-2.25465	0	0									GO_CATALYTIC_STEP_2_SPLICEOSOME	86	-0.52845	-1.93912	0	0.0270703
							GO_OXIDATIVE_DEMETHYLATION	17	-0.585477	-2.24138	0	0									GO_SEH1_ASSOCIATED_COMPLEX	17	-0.469922	-1.9429	0	0.0287622
							GO_RRNA_METHYLATION	24	-0.615006	-2.04946	0	0.00251015									GO_CILIARY_BASAL_BODY	119	-0.405077	-1.94926	0	0.0306797
							GO_NUCLEAR_TRANSCRIBED_MRNA_CATABOLIC_PROCESS_NONSENSE_MEDIATED_DECAY	119	-0.573571	-2.06545	0	0.0026067									GO_MITOCHONDRIAL_PROTEIN_COMPLEX	260	-0.563935	-1.9639	0.166667	0.0328711
							GO_RESOLUTION_OF_MEIOTIC_RECOMBINATION_INTERMEDIATES	17	-0.519535	-2.06984	0	0.00271096									GO_PRC1_COMPLEX	15	-0.640092	-1.914	0	0.0363313
							GO_POSITIVE_REGULATION_OF_MRNA_SPLICING_VIA_SPLICEOSOME	21	-0.503168	-2.09719	0	0.00282392									GO_MITOCHONDRIAL_MATRIX	463	-0.414227	-1.91678	0	0.0383497
							GO_RNA_MODIFICATION	159	-0.490758	-2.1096	0	0.0029467									GO_MITOCHONDRIAL_MEMBRANE_PART	225	-0.506128	-1.89054	0	0.0460539
							GO_RNA_3_END_PROCESSING	147	-0.459019	-2.12851	0	0.00308064
							GO_TRNA_METHYLATION	39	-0.484986	-2.17293	0	0.00322734
							GO_MRNA_SPLICE_SITE_SELECTION	30	-0.609562	-2.17302	0	0.0033887
							GO_SULFATE_TRANSPORT	17	-0.582151	-2.04633	0	0.00349288
							GO_ALTERNATIVE_MRNA_SPLICING_VIA_SPLICEOSOME	76	-0.524279	-2.19563	0	0.00356706
							GO_CILIUM_MOVEMENT	64	-0.497979	-1.99783	0	0.00479989
							GO_POSITIVE_REGULATION_OF_SIGNAL_TRANSDUCTION_BY_P53_CLASS_MEDIATOR	21	-0.547784	-1.9948	0	0.00601976
							GO_METHYLATION	349	-0.381003	-1.96912	0	0.00904705
							GO_REGULATION_OF_MAMMARY_GLAND_EPITHELIAL_CELL_PROLIFERATION	16	-0.562906	-1.97092	0	0.00933889
							GO_TRNA_PROCESSING	128	-0.515265	-1.95706	0	0.0100273
							GO_GPI_ANCHOR_BIOSYNTHETIC_PROCESS	31	-0.481995	-1.94162	0	0.0128438
							GO_REGULATION_OF_RNA_METABOLIC_PROCESS	218	-0.367973	-1.9428	0	0.0132108
							GO_NEGATIVE_REGULATION_OF_RNA_SPLICING	25	-0.577676	-1.94524	0	0.0135993
							GO_DNA_CATABOLIC_PROCESS_ENDONUCLEOLYTIC	32	-0.477253	-1.88629	0	0.0170828
							GO_NUCLEIC_ACID_PHOSPHODIESTER_BOND_HYDROLYSIS	285	-0.319555	-1.89844	0	0.0173291
							GO_CELLULAR_COMPONENT_DISASSEMBLY_INVOLVED_IN_EXECUTION_PHASE_OF_APOPTOSIS	35	-0.517417	-1.88956	0	0.0174895
							GO_HISTONE_H2A_MONOUBIQUITINATION	17	-0.581082	-1.89873	0	0.0177734
							GO_REGULATION_OF_DNA_DAMAGE_CHECKPOINT	17	-0.529125	-1.89297	0	0.0179161
							GO_MRNA_EXPORT_FROM_NUCLEUS	111	-0.403102	-1.89985	0	0.0182411
							GO_HISTONE_H2A_ACETYLATION	15	-0.561749	-1.90025	0	0.0187341
							GO_NUCLEAR_TRANSCRIBED_MRNA_CATABOLIC_PROCESS_EXONUCLEOLYTIC	35	-0.521342	-1.85198	0	0.0232329
							GO_REGULATION_OF_HISTONE_H3_K4_METHYLATION	27	-0.482199	-1.86501	0	0.0234118
							GO_HISTONE_H3_K27_METHYLATION	18	-0.464916	-1.85347	0	0.023707
							GO_RNA_PHOSPHODIESTER_BOND_HYDROLYSIS	144	-0.33249	-1.86666	0	0.0239439
							GO_TERMINATION_OF_RNA_POLYMERASE_II_TRANSCRIPTION	34	-0.477223	-1.85407	0	0.0242009
							GO_ATP_SYNTHESIS_COUPLED_ELECTRON_TRANSPORT	94	-0.662155	-1.85097	0	0.0244007
							GO_NEGATIVE_REGULATION_OF_MRNA_SPLICING_VIA_SPLICEOSOME	20	-0.668723	-1.85446	0	0.0247158
							GO_RNA_SPLICING_VIA_ENDONUCLEOLYTIC_CLEAVAGE_AND_LIGATION	16	-0.645205	-1.85735	0	0.0252531
							GO_RRNA_MODIFICATION	33	-0.588063	-1.84616	0	0.0253053
							GO_MACROMOLECULE_METHYLATION	293	-0.378694	-1.84341	0	0.0253927
							GO_MITOCHONDRIAL_RNA_METABOLIC_PROCESS	23	-0.5292	-1.84643	0	0.0257919
							GO_NEGATIVE_REGULATION_OF_MRNA_PROCESSING	29	-0.567259	-1.82116	0	0.0307925
							GO_DNA_TEMPLATED_TRANSCRIPTION_ELONGATION	111	-0.383752	-1.80372	0	0.0326435
							GO_TRNA_WOBBLE_URIDINE_MODIFICATION	17	-0.611518	-1.79999	0	0.0327893
							GO_INTRACILIARY_TRANSPORT_INVOLVED_IN_CILIUM_ASSEMBLY	40	-0.582884	-1.80428	0	0.0332063
							GO_HISTONE_H3_ACETYLATION	57	-0.453941	-1.8061	0	0.0336943
							GO_ASPARTATE_FAMILY_AMINO_ACID_CATABOLIC_PROCESS	22	-0.4524	-1.80511	0.166667	0.0337888
							GO_RNA_EXPORT_FROM_NUCLEUS	137	-0.391271	-1.79841	0	0.0342497
							GO_GLUTATHIONE_DERIVATIVE_BIOSYNTHETIC_PROCESS	21	-0.512634	-1.79464	0	0.0356244
							GO_RIBONUCLEOPROTEIN_COMPLEX_SUBUNIT_ORGANIZATION	245	-0.373037	-1.78549	0	0.0393581
							GO_AEROBIC_RESPIRATION	87	-0.50139	-1.78397	0	0.0399757
							GO_MITOCHONDRIAL_RNA_PROCESSING	15	-0.558798	-1.77701	0	0.0409516
							GO_RESPIRATORY_ELECTRON_TRANSPORT_CHAIN	113	-0.623772	-1.76753	0	0.0412433
							GO_HISTONE_H3_K4_METHYLATION	56	-0.434073	-1.76879	0	0.0418682
							GO_PROTEIN_METHYLATION	174	-0.371645	-1.76064	0	0.0441084
							GO_DNA_CATABOLIC_PROCESS	39	-0.404347	-1.75704	0	0.0464024
							GO_PEROXISOME_ORGANIZATION	78	-0.42409	-1.74694	0	0.0499117
